# Supplementary material for: NMR and Patch-Clamp Characterization of Yeast Mitochondrial Pyruvate Carrier Complexes
Source: MDPI journal article supplement (doi:10.3390/biom13050719), 2023-04-22
Supplement: s1 [file s1]

Article

# NMR and Patch-Clamp Characterization of Yeast Mitochondrial Pyruvate Carrier Complexes

Zhen Wang <sup>1,2</sup>, Wen Ding <sup>3</sup>, Maosen Ruan <sup>1</sup>, Yong Liu <sup>1,2</sup>, Jing Yang <sup>1</sup>, Huiqin Zhang <sup>1,4</sup>, Bing Shen <sup>3</sup>, Junfeng Wang <sup>1,2,4,\*</sup> and Yunyan Li <sup>1,\*</sup>

- 1 High Magnetic Field Laboratory, CAS Key Laboratory of High Magnetic Field and Ion Beam Physical Biology, Hefei Institutes of Physical Science, Chinese Academy of Sciences, Hefei 230031, China
  - 2 Hefei Institutes of Physical Science (Branch of Graduate School), University of Science and Technology of China, Hefei 230026, China
  - 3 School of Basic Medical Sciences, Anhui Medical University, Hefei 230032, China
  - 4 Institutes of Physical Science and Information Technology, Anhui University, Hefei 230601, China
- \* Correspondence: junfeng@hmfl.ac.cn (J.W.); yyli@hmfl.ac.cn (Y.L.)

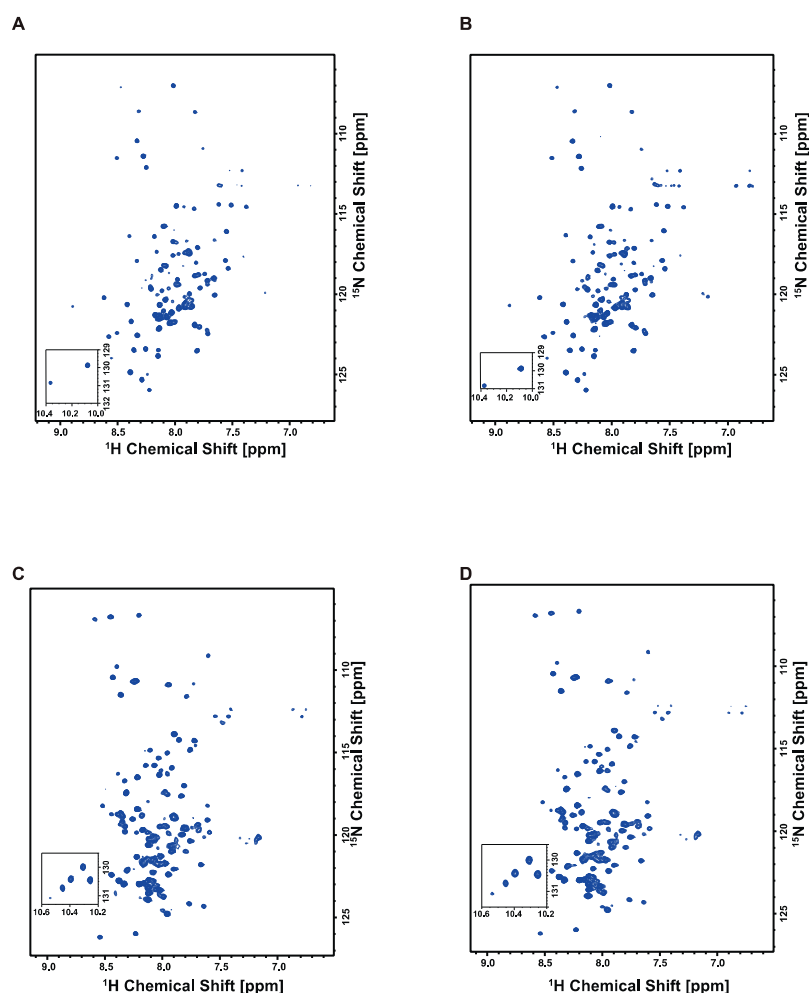

**Figure S1.** BEST-TROSY spectra of Mpc complexes. The peaks of aromatic amino acids were placed in separate boxes located in the lower left corner of each spectrum: (A) BEST-TROSY spectrum of <sup>15</sup>N Mpc1-Mpc1 Complex; (B) BEST-TROSY spectrum of <sup>15</sup>N Mpc1-Mpc2 Complex; (C) BEST-TROSY spectrum of <sup>15</sup>N Mpc2-Mpc1 Complex; (D) BEST-TROSY spectrum of <sup>15</sup>N Mpc2-Mpc2 Complex.

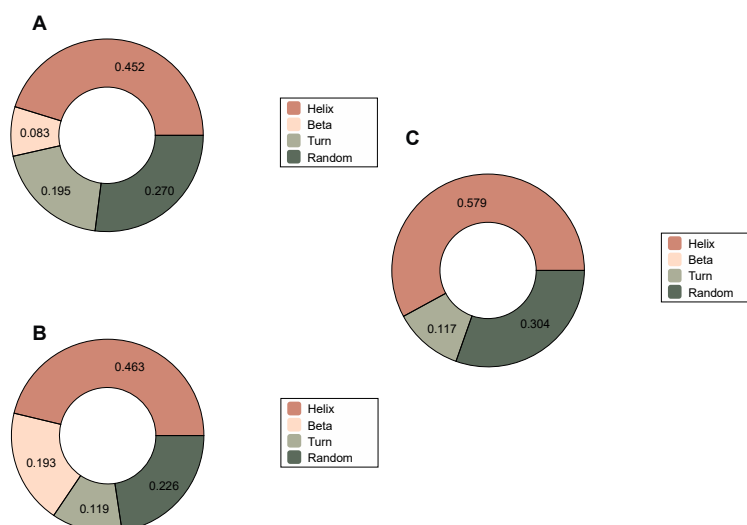

**Figure S2.** The proportion of secondary structure present in Mpc complexes. (A) Secondary structure proportion of Mpc1<sup>linker</sup>-Mpc1<sup>linker</sup>; (B) Secondary structure proportion of Mpc1<sup>linker</sup>-Mpc2; (C) Secondary structure proportion of Mpc2-Mpc2.

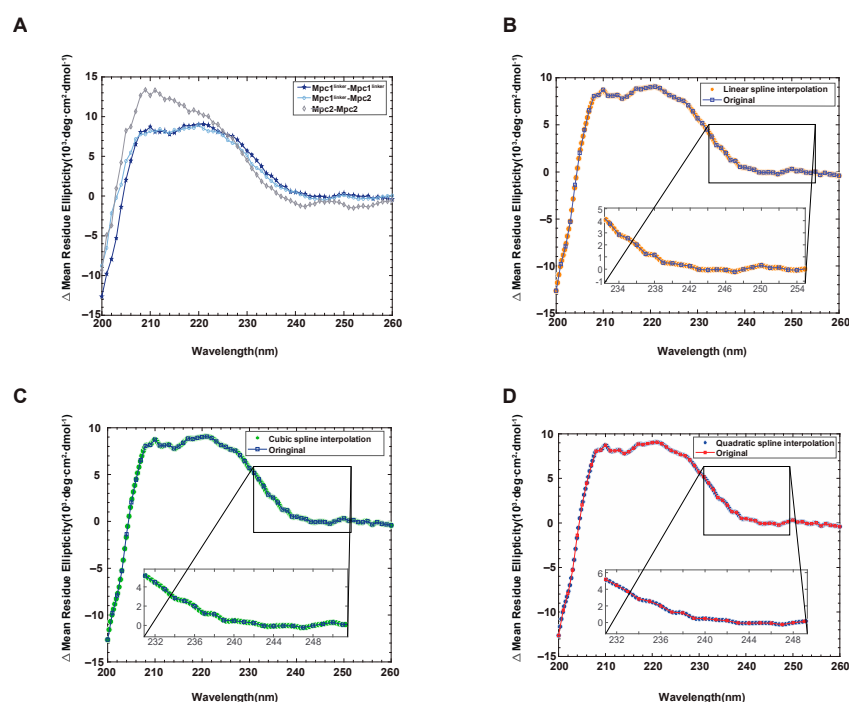

**Figure S3.** Spline interpolation method of the residual curves between CD curves of 95 °C and 25 °C. The introduction of spline interpolation is necessary for the calculation of the area between two curves when there are fewer data points than required. The last three (B–D) were cases of Mpc1<sup>linker</sup>-Mpc1<sup>linker</sup> to illustrate this method. The portion enclosed by the rectangular box in every single subfigure is the section between the two intersections of 25 °C CD curve and 95 °C CD curve: (A) Residual curves of three Mpc complexes; (B) Linear spline interpolation of the residual curve; (C) Cubic spline interpolation of the residue curve; (D) Quadratic spline interpolation of the residual curve.
